# Supplementary figures and images for: “Why Me?” Understanding the HCV Care Continuum Among People With Serious Mental Illness
Source: Atypon-hosted journal article supplement (doi:10.1176/appi.ps.201700542), 2018-09-17

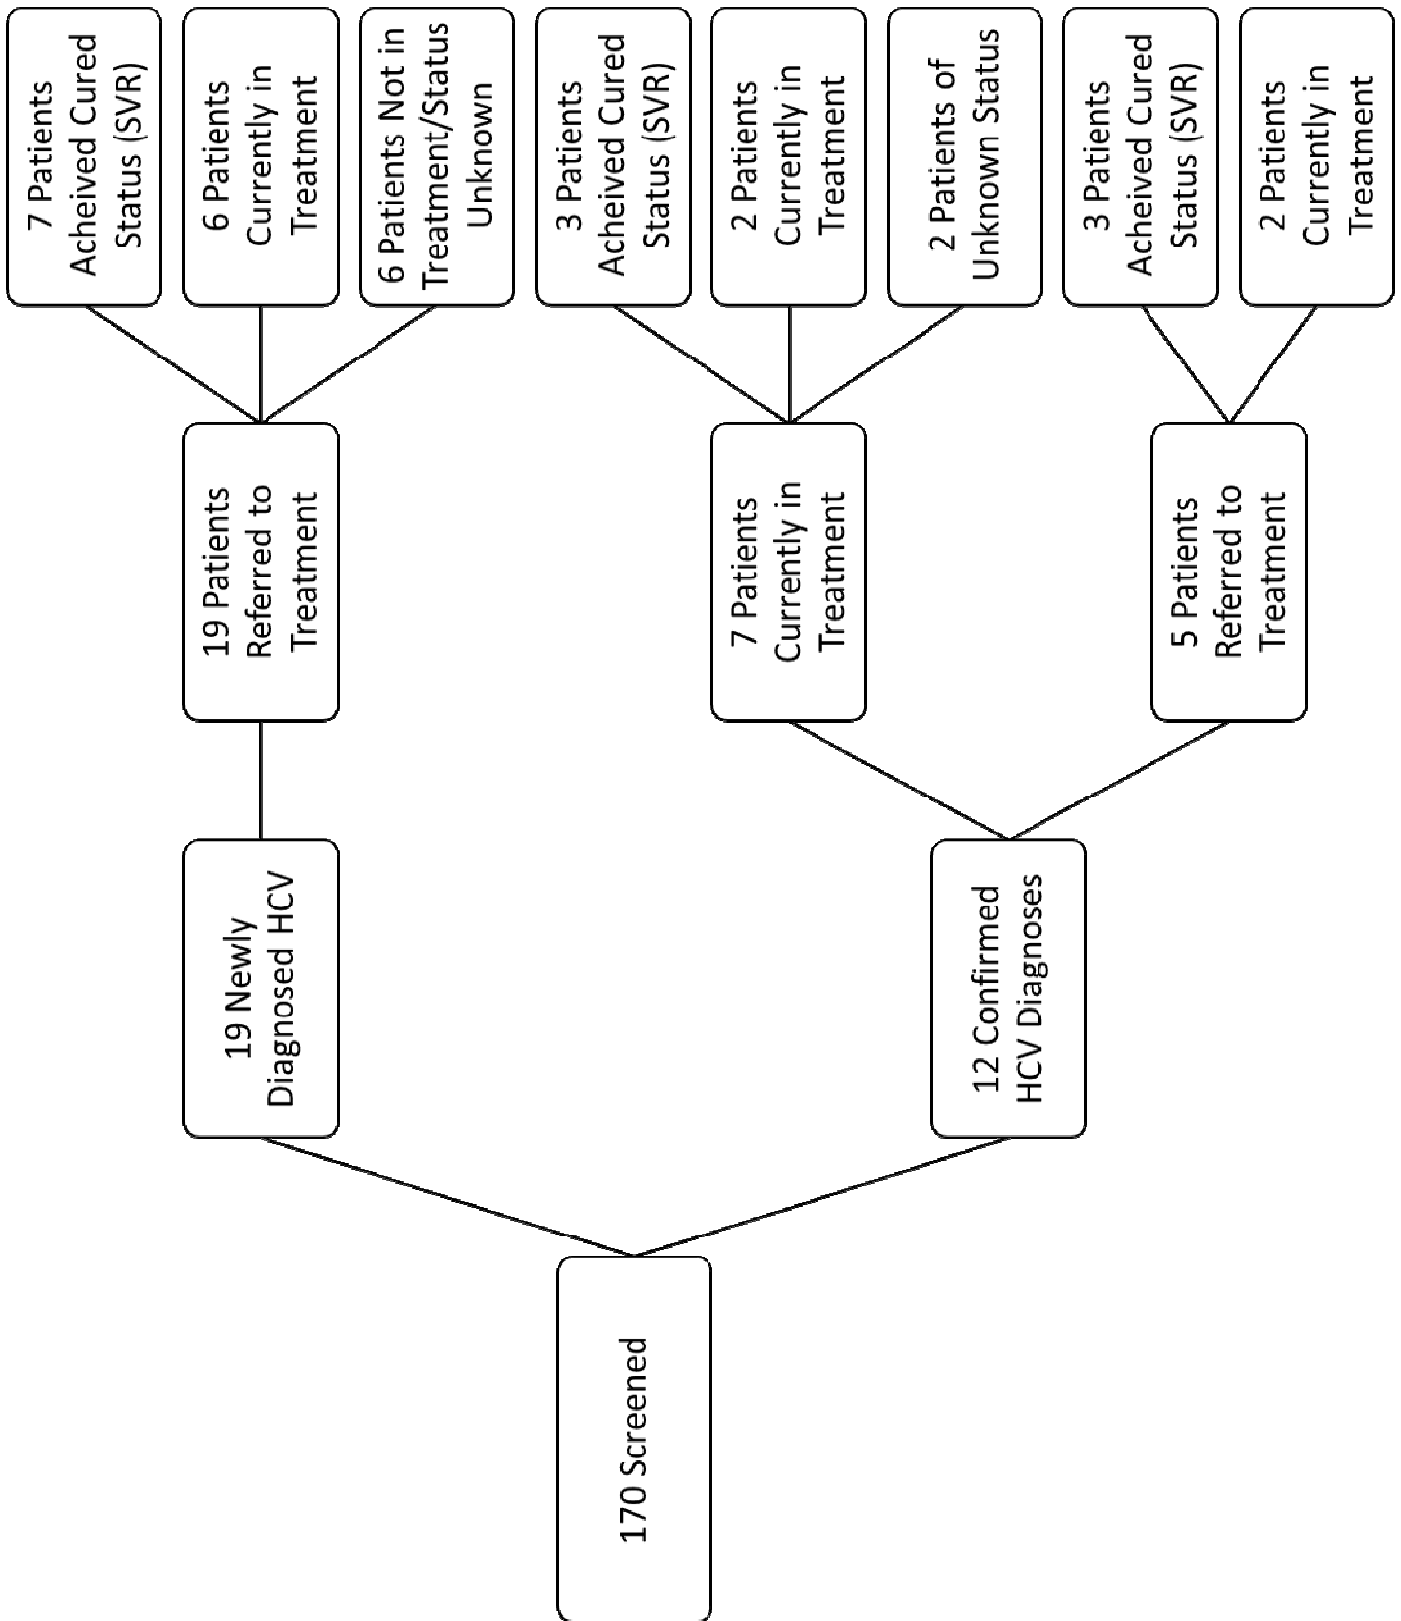

Supplement: appi.ps.201700542.ds001.pdf [file appi.ps.201700542.ds001.pdf]
